# Supplementary material for: A highly efficient zinc catalyst for selective electroreduction of carbon dioxide in aqueous NaCl solution
Source: Royal Society of Chemistry journal article supplement (doi:10.1039/c5ta04102c), 2015-01-01
Supplement: c5ta04102c1.pdf [file c5ta04102c1.pdf]

## **Supplementary Information**

### **Highly Efficient Zinc Catalyst for Selective Electroreduction of Carbon Dioxide in Aqueous NaCl Solution**

Fengjiao Quan, Dan Zhong, Hancheng Song, Falong Jia\* and Lizhi Zhang

*College of Chemistry, Central China Normal University, Wuhan 430079, P. R. China*

\*Corresponding Author

E-mail: [fljia@mail.ccnu.edu.cn](mailto:fljia@mail.ccnu.edu.cn)

## Experimental

A schematic process is illustrated for the synthesis of the n-Zn electrode (Scheme S1). Firstly, a piece of commercial zinc foil (99.999%, Alfa aesar) was anodized at constant current density ( $0.3 \text{ mA cm}^{-2}$ ) for 90 min in zincate-saturated solution with reference to the work by Wu et al.<sup>1</sup>. To fabricate uniform ZnO nanoplates on the surface of Zn foil, we made some modifications: (a) The Zn foil is firstly electro-activated under cathodic condition ( $5 \text{ mA cm}^{-2}$  for 5 min) in  $0.2 \text{ M Na}_3\text{PO}_4$  solution; (b) the anodization was carried out under open atmosphere. The as-formed ZnO was then electroreduced at  $-1.3 \text{ V}$  (vs. SCE) for 30 min in Ar-bubbled  $0.5 \text{ M NaHCO}_3$  solution. After that, n-Zn was fabricated on the Zn foil and used as a working electrode for  $\text{CO}_2$  reduction in a H-type cell (Figure 1a) adopted from our previous work<sup>2</sup>. The anode compartment was filled with  $0.5 \text{ M NaHCO}_3$  solution, and the cathodic compartment was filled with aqueous solutions containing various sodium salts ( $0.5 \text{ M}$ ). During the electrolysis,  $\text{CO}_2$  was bubbled into the solution with a flow rate of  $20 \text{ sccm}$  and was vented directly into the gas-sampling loop of a gas chromatograph (GC, Hengxin GC-2020)<sup>2</sup>. Gas-phase product of CO was analyzed by a flame ionization detector, and hydrogen was detected by a thermal conductivity detector using a MolSieve 5A column. The liquid product (formate) was analyzed by an ion chromatograph (ICS-900, Dionex Corporation) after electrolysis with total consumed charge of 5 coulomb.

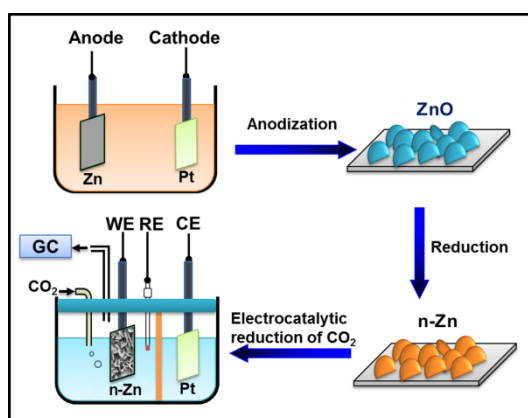

**Scheme S1.** Schematic process for fabricating n-Zn catalyst to catalyze  $\text{CO}_2$  reduction.

Considering that the value of  $j_{CO}$  is proportional to the reaction rate for the conversion of  $CO_2$  to CO, the relationship between the  $j_{CO}$  and the concentration of salts will provide information to determine if the salts participate into the  $CO_2$  reduction. The partial current density of CO production was calculated as follows<sup>3</sup>:

$$j_{CO} = \frac{GC \text{ peak area}}{\alpha} \times \text{flow rate} \times \frac{2Fp_0}{RT} \times (\text{electrode area})^{-1}$$

where  $R$  is the gas constant,  $F$  is the Faradaic constant,  $p_0 = 1.013$  bar and  $T = 298.15$  K.  $\alpha$  is a conversion factor for CO respectively based on the calibration of the GC.

Surface roughness factors for the n-Zn and Zn foil electrodes relative to mirror-polished Zn working electrode were determined by the integration of charge consumed in the reduction of zinc oxide, which was formed during the anodic scan in alkaline 0.1 M  $NaClO_4$  solution (pH=10, adjusted by NaOH). The roughness factors were calculated to be 23 and 1.5 for the n-Zn and Zn foil electrodes, respectively. X-ray diffraction (XRD) patterns were recorded on a Philips MPD 18801 diffraction-meter ( $CuK\alpha$  radiation,  $\lambda = 1.5418$  Å, 20 KV, 150 mA). The morphology of the samples was observed using a JEOL-6700F scanning electron microscopy (SEM). Transmission microscopy (TEM) images were analyzed using Tecnai equipment (Tecnai G2 F30) operating at a voltage of 200 kV. Raman spectra were collected by a confocal laser micro-Raman spectrometer (Thermo DXR Microscope, USA) equipped with a laser (532 nm, 5 mW). In situ Raman spectroscopy measurements utilized a similar spectroelectrochemical cell adopted in a published work<sup>4</sup>.

To study the effect of catalyst size on  $CO_2$  reduction, commercial ZnO nanoparticles were purchased from US Research Nanomaterials, Inc. Three types of ZnO products were investigated in this work, and the corresponding sizes were 80 ~ 200 nm (Stock#: US3555), 35 ~ 45 nm (Stock #: US3580) and 10 ~ 30 nm (Stock #: US3590), respectively. ZnO nanoparticles were coated onto a glass carbon electrode by the following procedure. ZnO nanoparticles (10 mg) were ultrasonically dispersed in 0.5 ml Nafion solution (2 wt% in isopropanol). The ZnO slurry was dropped onto a glass carbon (GC) plate (2 cm<sup>2</sup> exposed area) and a compact film of ZnO

nanoparticles was formed under heating at 50 °C. Then, these ZnO nanoparticles were reduced to Zn by the same electrochemical method introduced above and used as an electrode for CO<sub>2</sub> reduction.

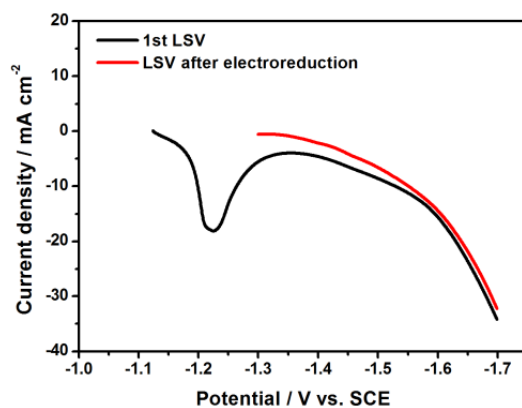

**Figure S1.** LSV curves recorded on an anodized Zn foil electrode in Ar-bubbled 0.5 M NaHCO<sub>3</sub> solution.

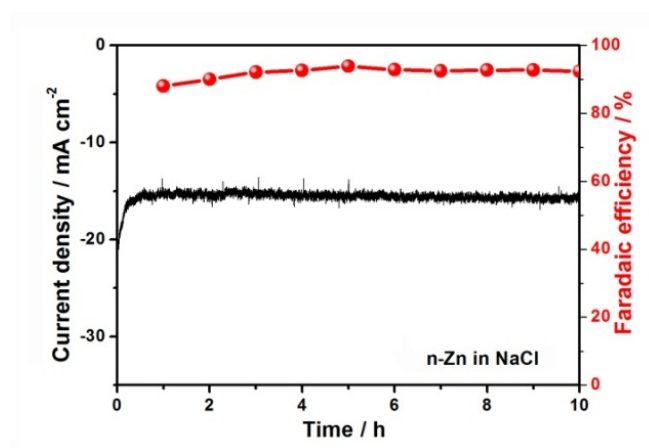

**Figure S2.** Current density and FE<sub>CO</sub> obtained on a n-Zn electrode during continuous electrolysis at -1.6 V in CO<sub>2</sub> saturated NaCl solution.

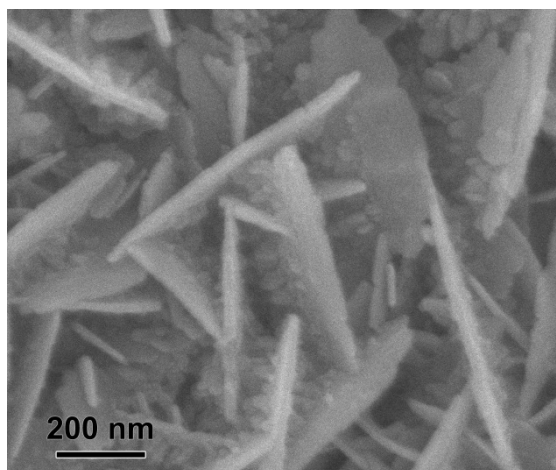

**Figure S3.** SEM image of a n-Zn electrode after continuous electrolysis at -1.6 V in  $\text{CO}_2$  saturated NaCl solution.

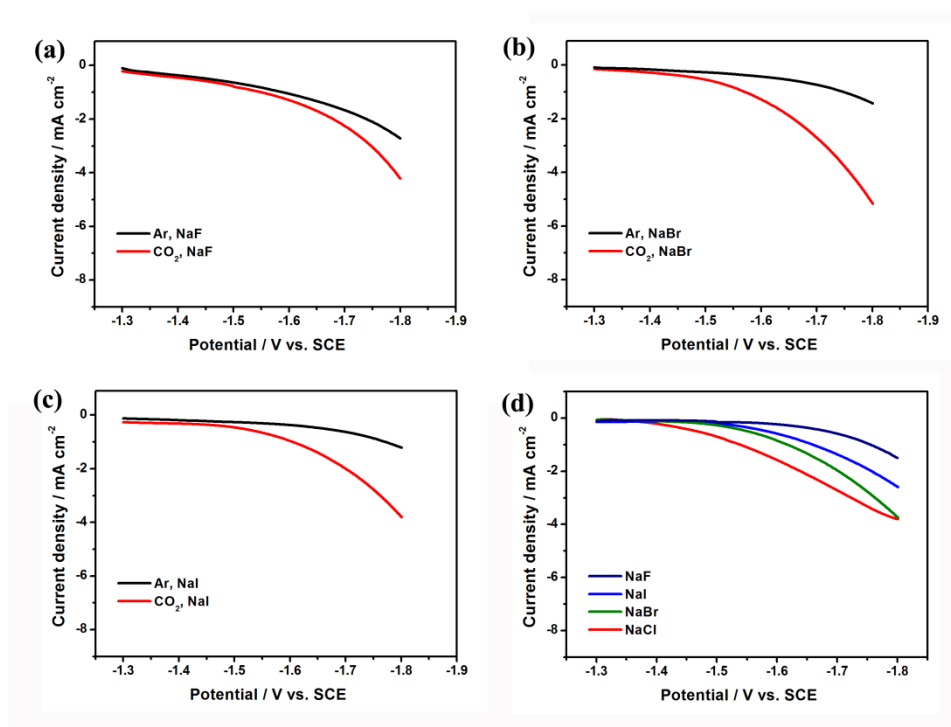

**Figure S4.** LSV curves recorded on a Zn foil electrode in Ar- or  $\text{CO}_2$ - saturated NaF (a), NaBr (b), and NaI (c) solutions adjusted to a pH of 4.5. (d) Comparison of current differences from the  $\text{CO}_2$  and Ar saturated solutions. The result in NaCl solution is calculated by the data listed in Figure 3c.

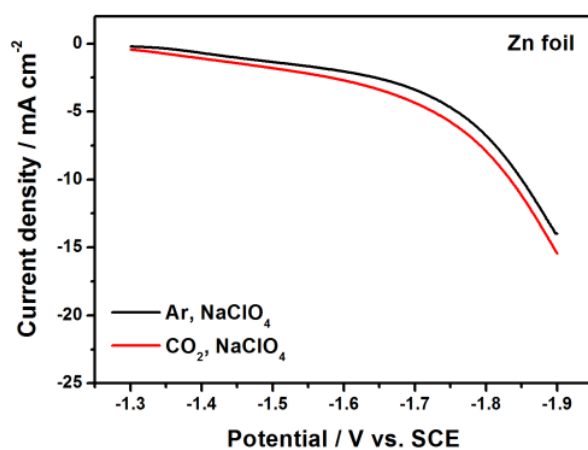

**Figure S5.** LSV curves recorded on Zn foil electrode in Ar or CO<sub>2</sub> saturated NaClO<sub>4</sub> solutions which were adjusted to a pH of 4.5.

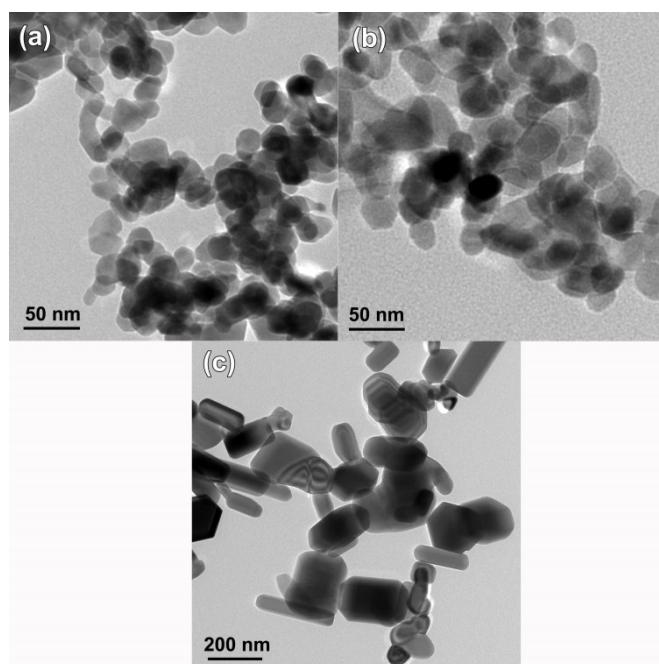

**Figure S6.** TEM images of commercial ZnO nanoparticles in size of 10 ~ 30 nm (a), 35 ~ 45 nm (b) and 80 ~ 200 nm (c).

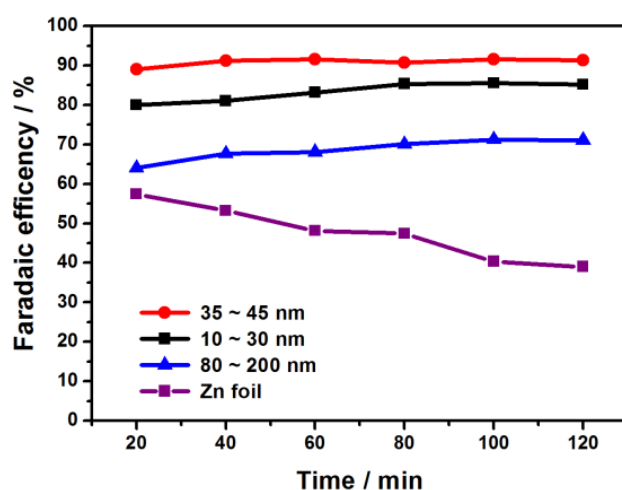

**Figure S7.**  $FE_{CO}$  versus electrolysis time at -1.6 V on various zinc catalysts in NaCl solution.

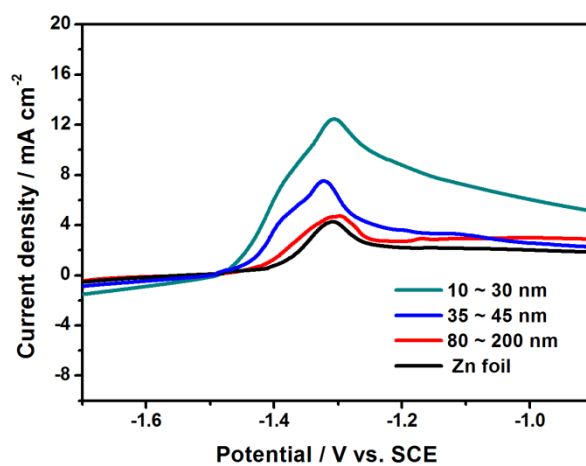

**Figure S8.** LSV scans (from -1.7 to -0.9 V) in Ar-saturated 0.1 M NaOH at Zn catalysts with different particle size.

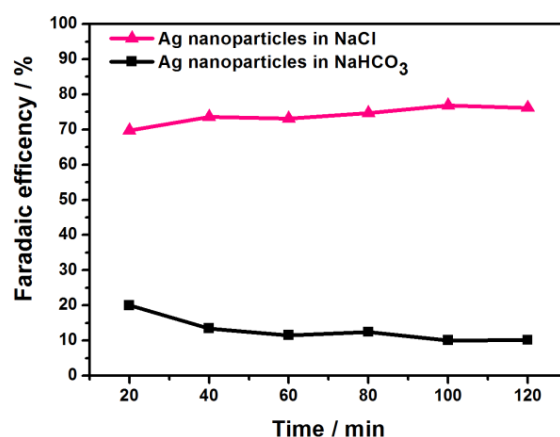

**Figure S9.**  $FE_{CO}$  versus electrolysis time at the optimum potential of -1.6 V on Ag nanoparticle catalyst in NaCl or NaHCO<sub>3</sub> solution. Commercial silver nanoparticles (20 ~ 40 nm) were purchased from Alfa aesar without any modification by organic surfactant. The silver nanoparticles were coated onto a glass carbon electrode in the same way as that of ZnO nanoparticles.

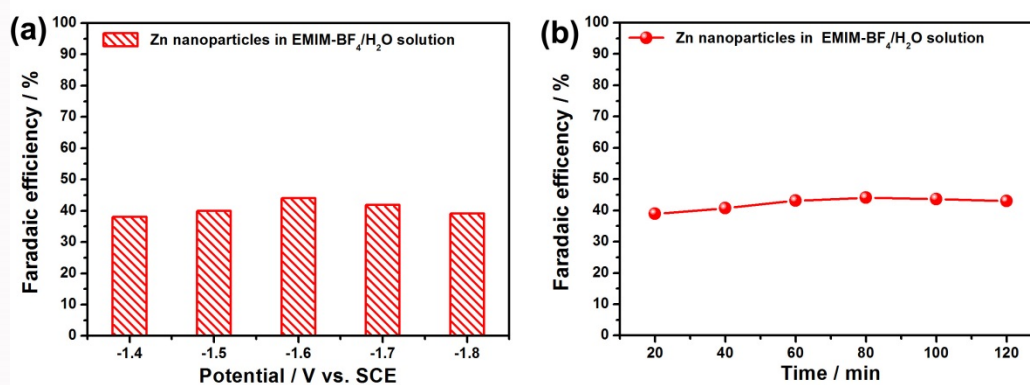

**Figure S10.** Electrocatalytic activity of Zn nanoparticles toward CO<sub>2</sub> reduction in an ionic liquid / H<sub>2</sub>O solution. (a)  $FE_{CO}$  versus applied potentials. (b)  $FE_{CO}$  versus electrolysis time at -1.6 V. The ionic liquid / H<sub>2</sub>O was prepared by dissolving 1-ethyl-3-methylimidazolium tetrafluoroborate (EMIM-BF<sub>4</sub>) in water at a concentration of 18 mol%<sup>5</sup>. The Zn nanoparticles were derived from the reduction of ZnO (35 ~ 45 nm) particles.



## References:

1. X. Wu, G. Lu, C. Li and G. Shi, *Nanotechnology*, 2006, **17**, 4936.
2. H. Zhang, Y. Ma, F. Quan, J. Huang, F. Jia and L. Zhang, *Electrochem. Commun.*, 2014, **46**, 63-66.
3. Y. Chen, C. W. Li and M. W. Kanan, *J. Am. Chem. Soc.*, 2012, **134**, 19969-19972.
4. W.-B. Cai and D. A. Scherson, *J. Electrochem. Soc.*, 2003, **150**, B217-B223.
5. B. A. Rosen, A. Salehi-Khojin, M. R. Thorson, W. Zhu, D. T. Whipple, P. J. A. Kenis and R. I. Masel, *Science*, 2011, **334**, 643-644.
